# Supplementary material
Source: PubMed Central journal article supplement (PMC5370567)
Supplement: NIHMS850743-supplement-Supplemental_Table_1.pdf [file NIHMS850743-supplement-Supplemental_Table_1.pdf]

|                                   | Hospital CC              | Hospital NMH              |
|-----------------------------------|--------------------------|---------------------------|
| Number of Patients                | 128                      | 50                        |
| Number of Patients with 1 Visit   | 58                       | 19                        |
| Number of Patients with 2 Visits  | 37                       | 19                        |
| Number of Patients with 3 Visits  | 33                       | 12                        |
| Average Visits per Patient        | 1.8                      | 1.86                      |
| Total Number of Samples           | 231                      | 93                        |
| <b>Demographics (per patient)</b> |                          |                           |
| Age                               | 40 (20-50)               | 31 (22-51)                |
| Race                              |                          |                           |
| African-American                  | 98                       | 27                        |
| Asian                             | 0                        | 3                         |
| Mixed                             | 3                        | 1                         |
| Other                             | 5                        | 4                         |
| White                             | 13                       | 15                        |
| Not Available/Not Provided        | 9                        | 0                         |
| HIV Status                        |                          |                           |
| Positive                          | 71                       | 19                        |
| Negative                          | 57                       | 31                        |
| Ethnicity                         |                          |                           |
| Non-Hispanic                      | 114                      | 46                        |
| Hispanic                          | 5                        | 4                         |
| Not Available/Not Provided        | 9                        | 0                         |
| Year of HIV Diagnosis             | 2002 (1989-2014)         | 2003 (1989-2010)          |
| HIV Regimen                       |                          |                           |
| Most common                       | Atripla                  | Norvir, Reyataz, Truvada  |
| Second most common                | Norvir, Reyataz, Truvada | Kaletra, Truvada          |
| Third most common                 | None                     | Norvir, Prezista, Truvada |
| <b>Metadata (per sample)</b>      |                          |                           |
| pH                                | 4.61 (3.78-8.4)          | 4.13 (3.37-7.72)          |
| Hormonal Therapy                  |                          |                           |
| Yes                               | 7                        | 30                        |
| No                                | 199                      | 63                        |
| Not Available/Not Provided        | 25                       | 0                         |
| Vaginal Sex Within Last 72 hours  |                          |                           |
| Yes                               | 28                       | 27                        |
| No                                | 178                      | 66                        |
| Not Available/Not Provided        | 25                       | 0                         |
| Vaginal Sex <72h With Condom      |                          |                           |
| Yes                               | 17                       | 7                         |
| No                                | 11                       | 20                        |
| Last Vaginal Sex if <72h          | 48 hours ago (10-72)     | 48 hours ago (8-72)       |
| Most Recent CD4 Count             | 516 (21-1292)            | 429.5 (2-1300)            |
| Most Recent Viral Load            | <40                      | <20                       |

|                             |           |           |
|-----------------------------|-----------|-----------|
| Opportunistic Infection     |           |           |
| Yes                         | 5         | 0         |
| No                          | 200       | 93        |
| Not Available/Not Provided  | 26        | 0         |
| Oral Steroid                |           |           |
| Yes                         | 1         | 0         |
| No                          | 205       | 93        |
| Not Available/Not Provided  | 25        | 0         |
| Inhaled Steroid             |           |           |
| Yes                         | 22        | 5         |
| No                          | 184       | 88        |
| Not Available/Not Provided  | 25        | 0         |
| Immunomodulators            |           |           |
| Yes                         | 108       | 0         |
| No                          | 96        | 93        |
| Not Available/Not Provided  | 27        | 0         |
| Most Common Immunomodulator | Albuterol | -         |
| Menstrual Cycle Day         | 14 (8-19) | 13 (6-27) |
| Vaginal Discharge Volume    |           |           |
| Decreased                   | 3         | 3         |
| Increased                   | 19        | 3         |
| Normal                      | 184       | 87        |
| Not Available/Not Provided  | 25        | 0         |
| Vaginal Discharge Color     |           |           |
| Brown/Blood                 | 10        | 14        |
| White/Clear                 | 195       | 77        |
| Yellow/Green                | 1         | 2         |
| Not Available/Not Provided  | 25        | 0         |
| Vaginal Discharge Character |           |           |
| Bloody                      | 8         | 2         |
| Curdy                       | 1         | 8         |
| Milky/Creamy                | 23        | 2         |
| Normal                      | 173       | 80        |
| Purulent                    | 0         | 1         |
| Thin/Watery                 | 1         | 0         |
| Not Available/Not Provided  | 25        | 0         |
| Cervical Lesions            |           |           |
| Yes                         | 8         | 6         |
| No                          | 197       | 87        |
| Not Available/Not Provided  | 26        | 0         |
| Cervical Exudate            |           |           |
| Yes                         | 156       | 2         |
| No                          | 49        | 91        |
| Not Available/Not Provided  | 26        | 0         |
| Trichomonas                 |           |           |
| Yes                         | 4         | 0         |

|                             |                 |                   |
|-----------------------------|-----------------|-------------------|
| No                          | 202             | 93                |
| Not Available/Not Provided  | 25              | 0                 |
| Clue Cells                  |                 |                   |
| Yes                         | 21              | 11                |
| No                          | 185             | 82                |
| Not Available/Not Provided  | 25              | 0                 |
| Increased White Blood Cells |                 |                   |
| Yes                         | 0               | 5                 |
| No                          | 206             | 88                |
| Not Available/Not Provided  | 25              | 0                 |
| Yeast                       |                 |                   |
| Yes                         | 0               | 9                 |
| No                          | 206             | 84                |
| Not Available/Not Provided  | 25              | 0                 |
| Amine Odor                  |                 |                   |
| Yes                         | 59              | 15                |
| No                          | 147             | 78                |
| Not Available/Not Provided  | 25              | 0                 |
| KOH pH                      | 5 (4-6.5)       | 4 (4-9)           |
| Herpes                      |                 |                   |
| Yes                         | 5               | 0                 |
| No                          | 201             | 93                |
| Not Available/Not Provided  | 25              | 0                 |
| Warts                       |                 |                   |
| Yes                         | 11              | 0                 |
| No                          | 195             | 93                |
| Not Available/Not Provided  | 25              | 0                 |
| Estradiol                   | 81(13-567)      | 72(13-1132)       |
| Progesterone                | 0.7(0.01-21.63) | 0.715(0.01-16.67) |
| Nugent Score                | 7 (0-10)        | 1(0-10)           |
| Bacterial Vaginosis         |                 |                   |
| Indeterminate               | 35              | 8                 |
| Negative                    | 75              | 55                |
| Positive                    | 115             | 29                |
| Not Available/Not Provided  | 6               | 1                 |

---
