# Supplementary material
Source: PubMed Central journal article supplement (PMC5370567)

**Figure S1****A**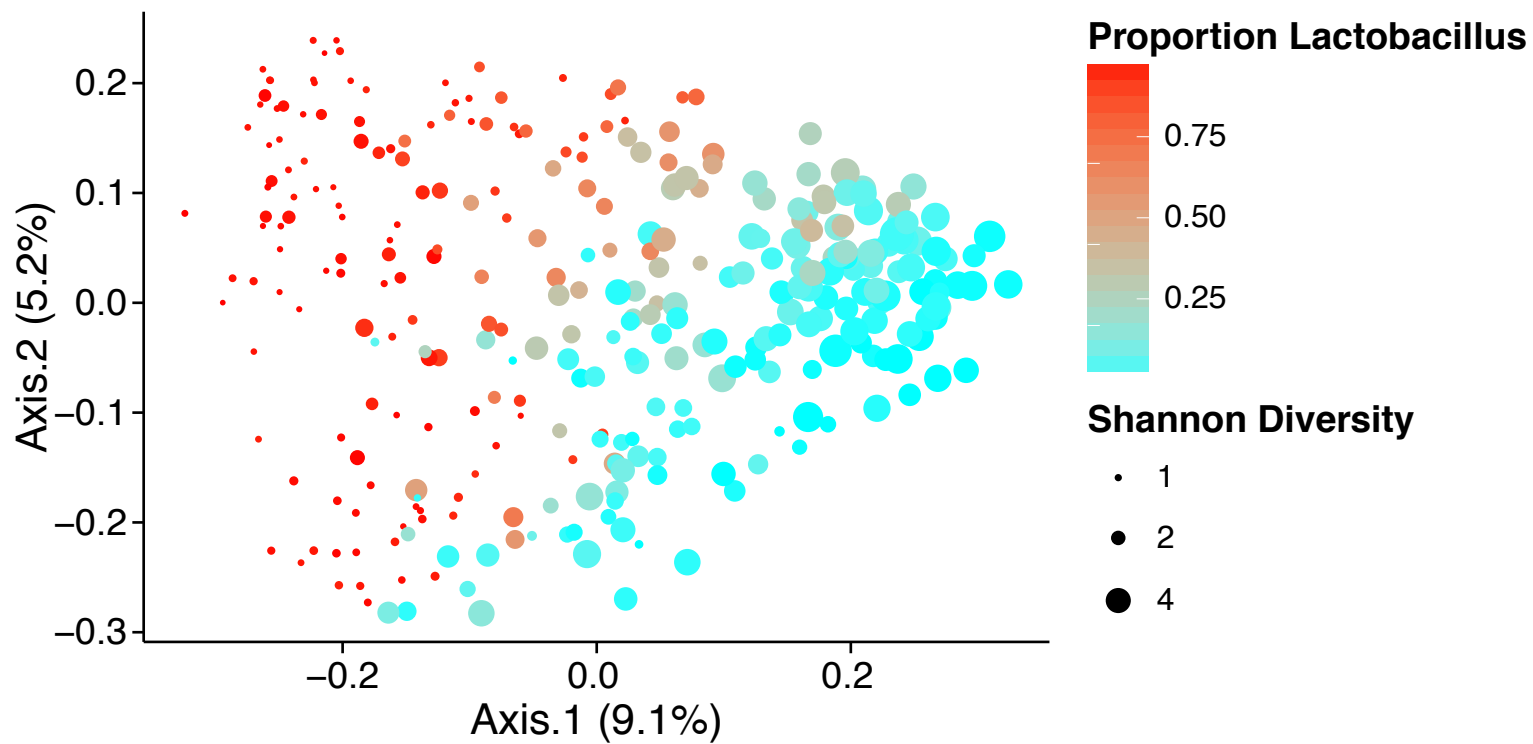**B**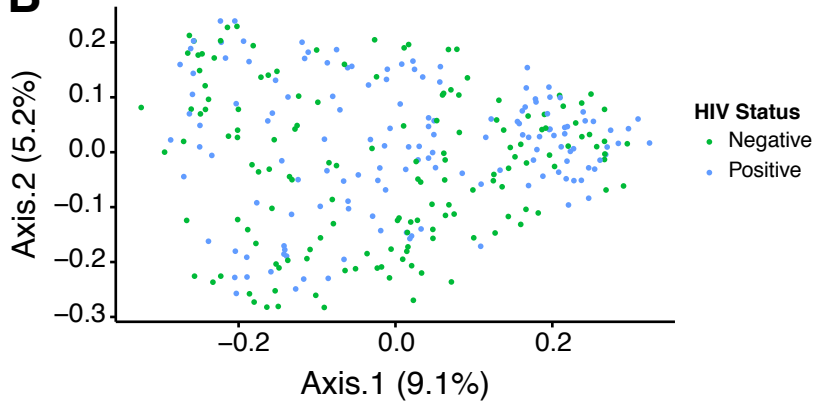**C**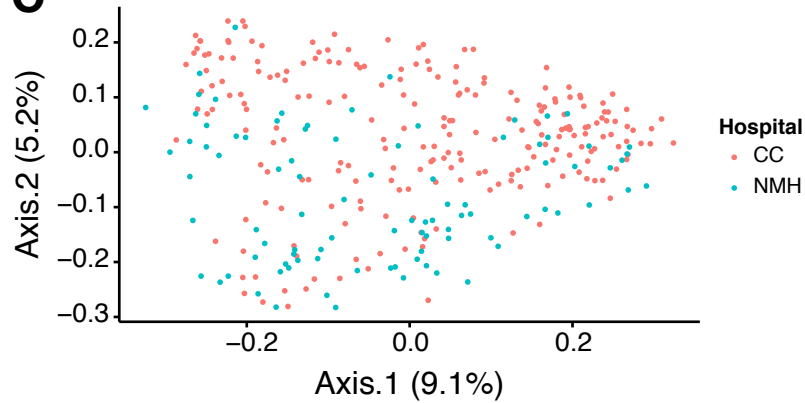**D**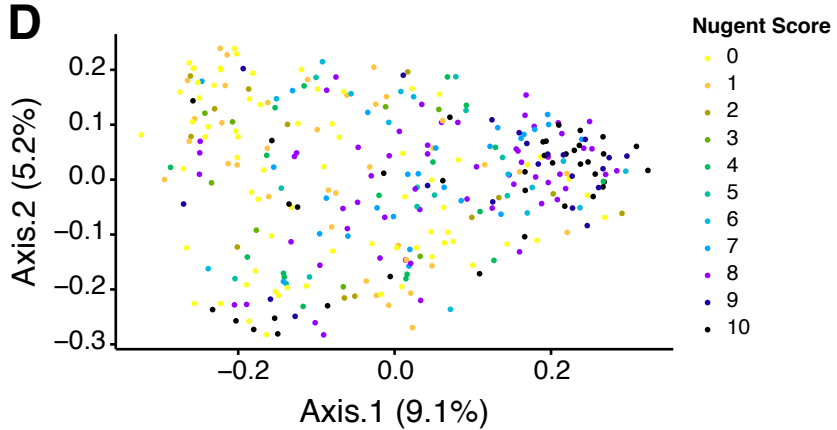**E**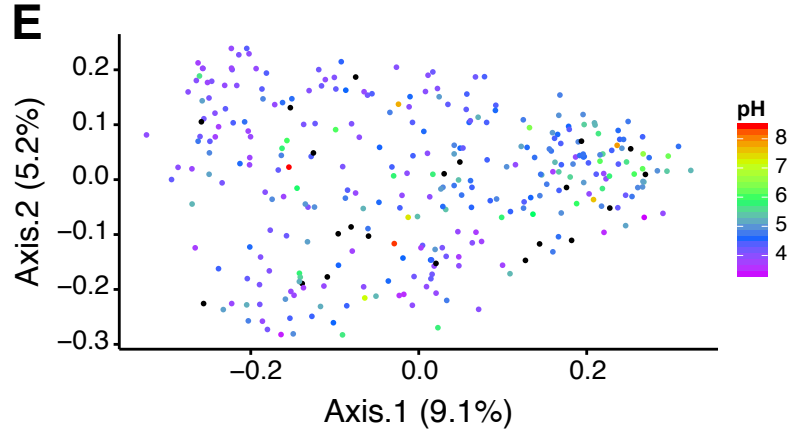**F**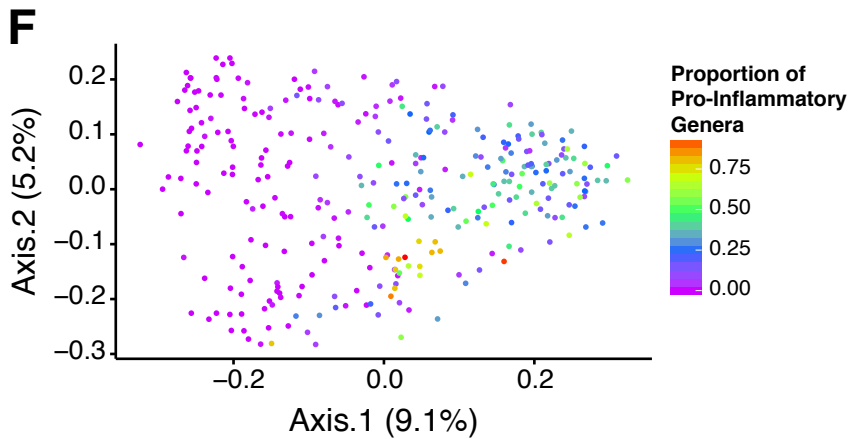**G**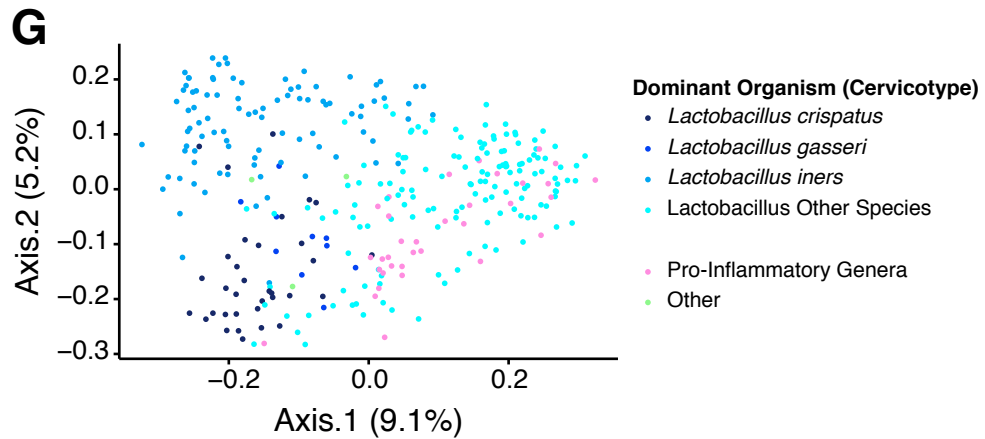

Supplement: NIHMS850743-supplement-Supplemental_Figure_1.pdf [file NIHMS850743-supplement-Supplemental_Figure_1.pdf]

**Figure S2**

**A**

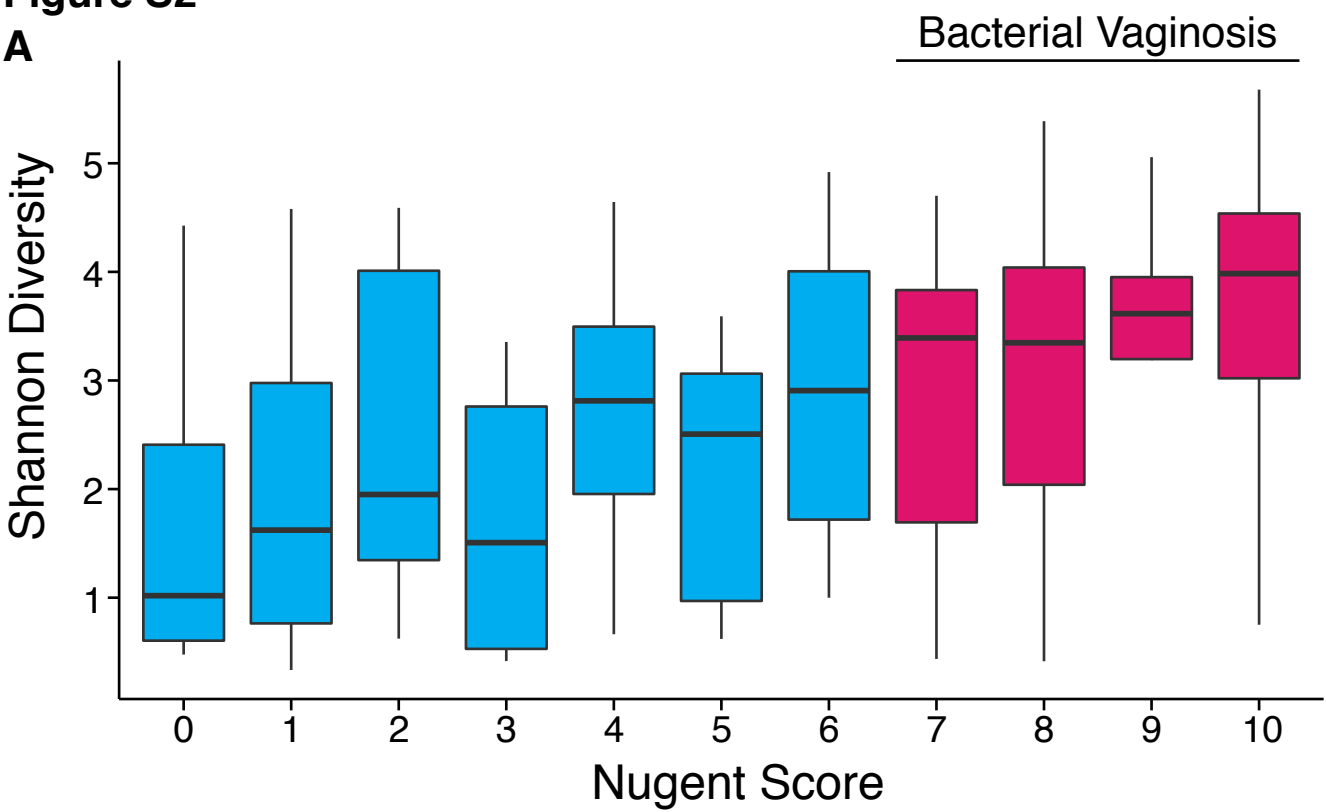

**B**

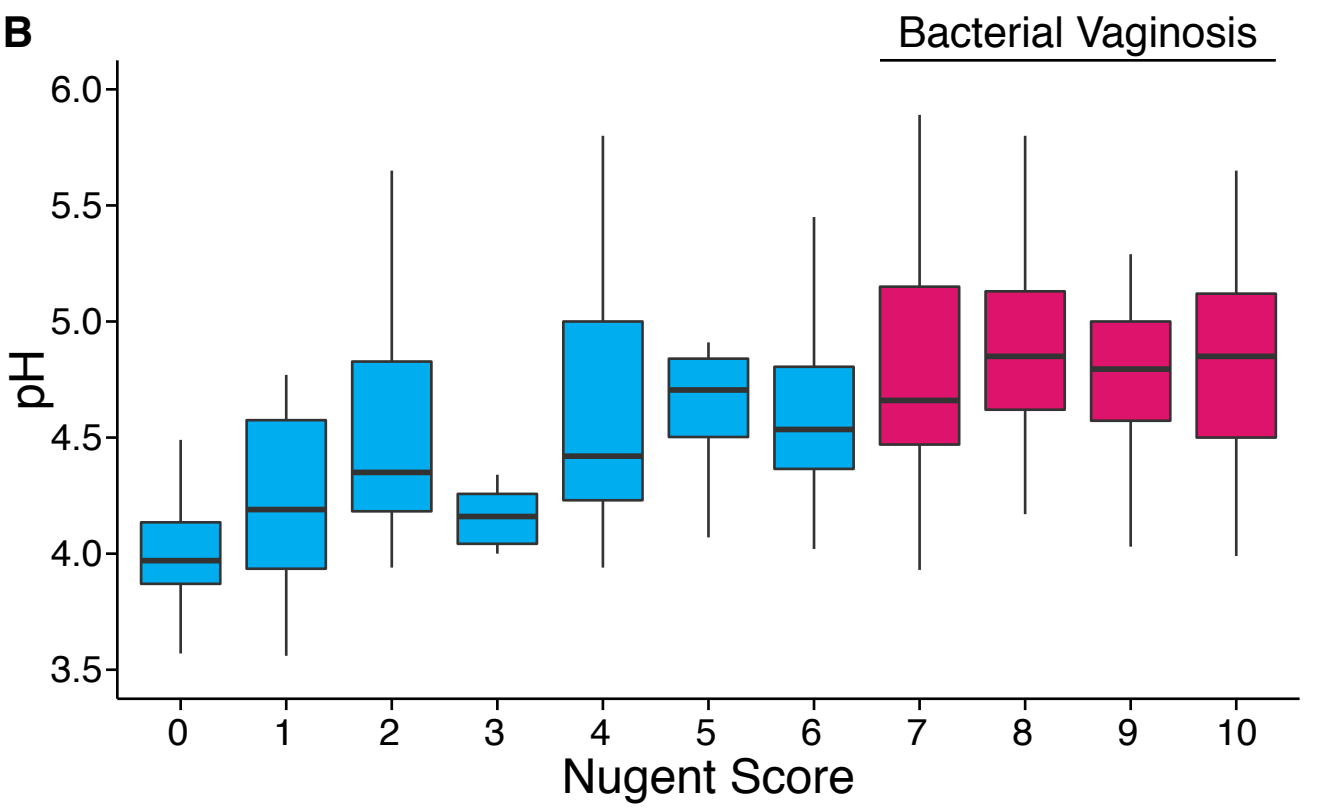

Supplement: NIHMS850743-supplement-Supplemental_Figure_2.pdf [file NIHMS850743-supplement-Supplemental_Figure_2.pdf]

**Figure S3**

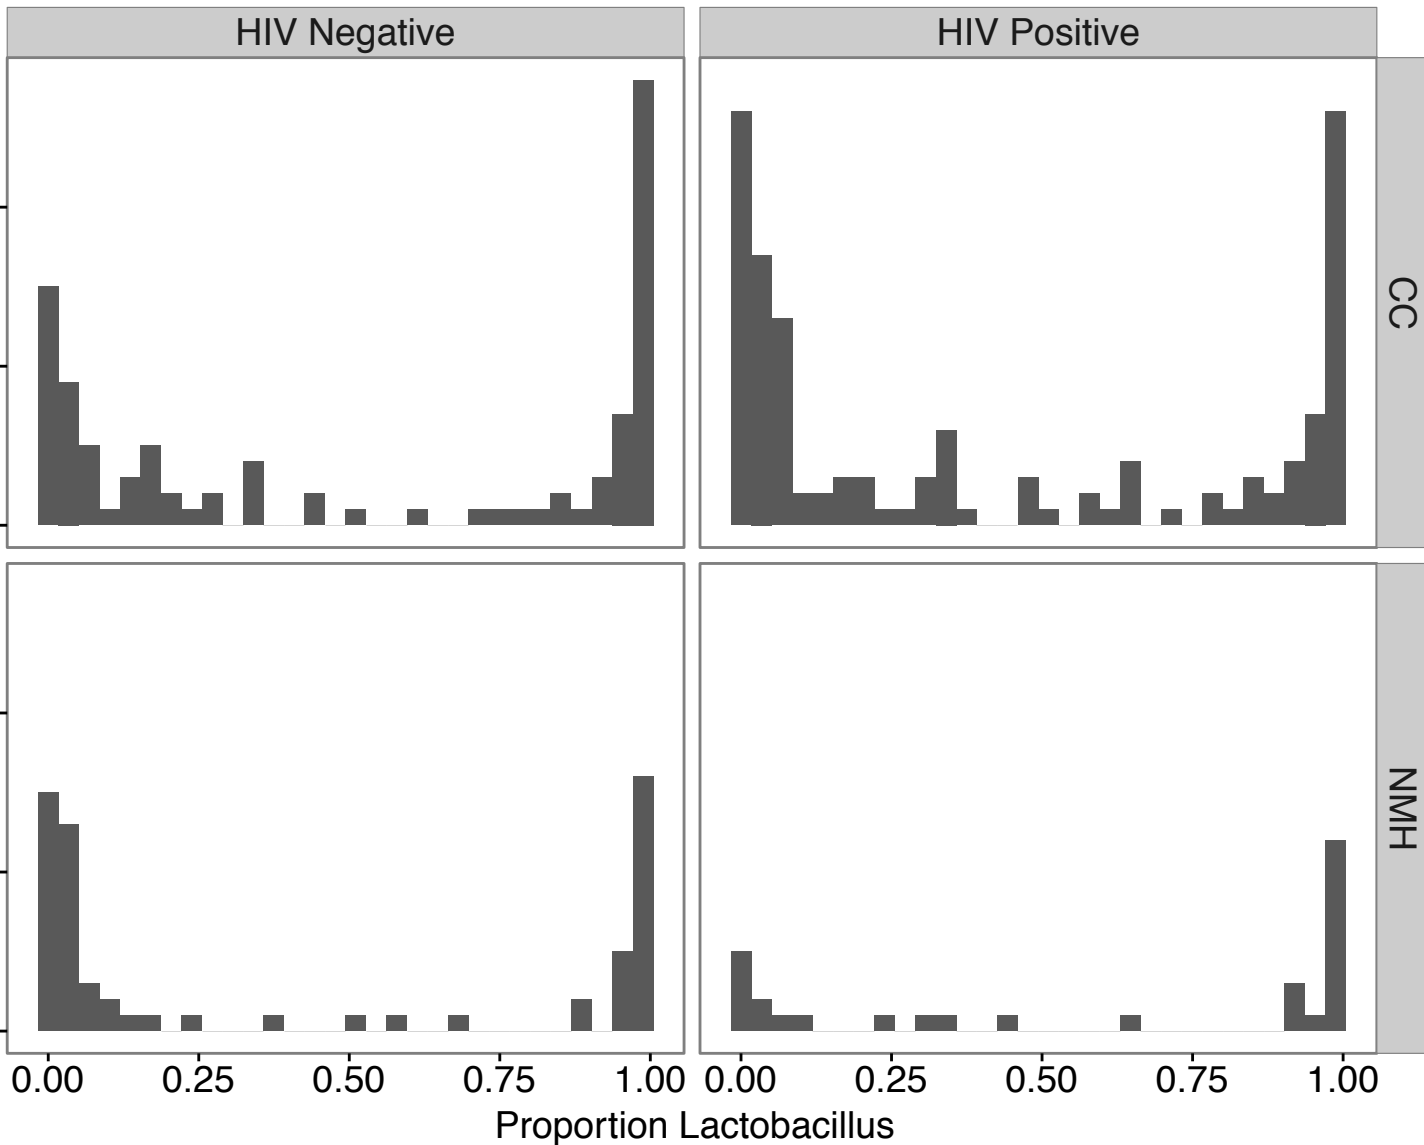

Supplement: NIHMS850743-supplement-Supplemental_Figure_3.pdf [file NIHMS850743-supplement-Supplemental_Figure_3.pdf]

**Figure S4****A**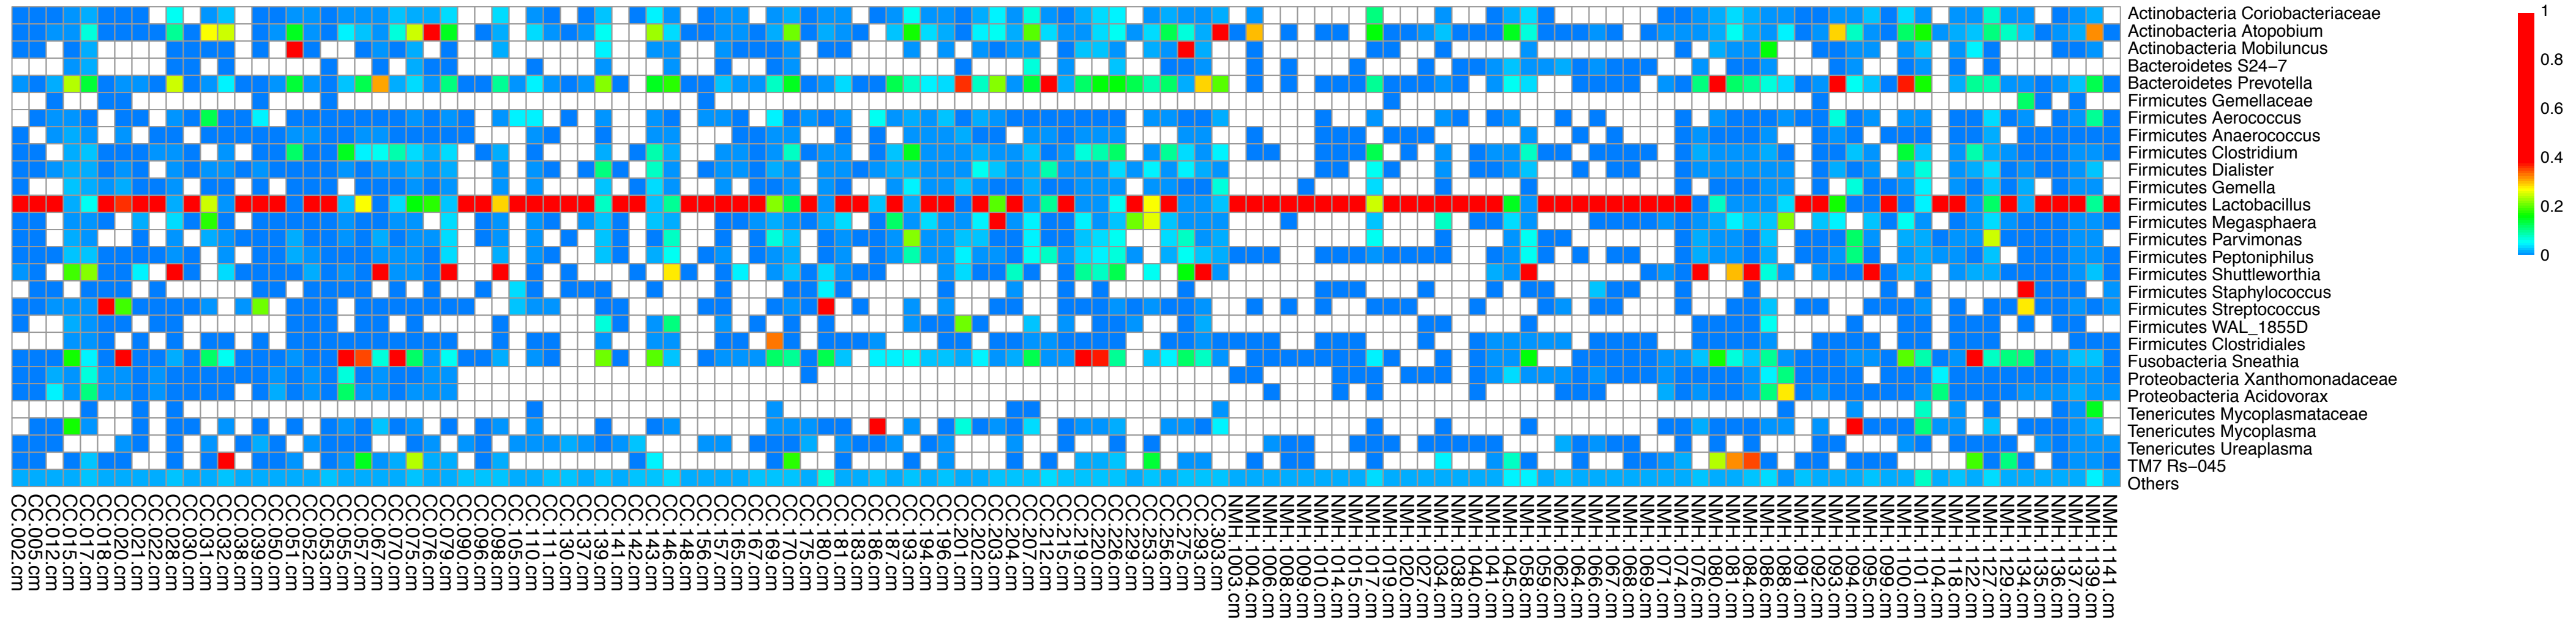**B**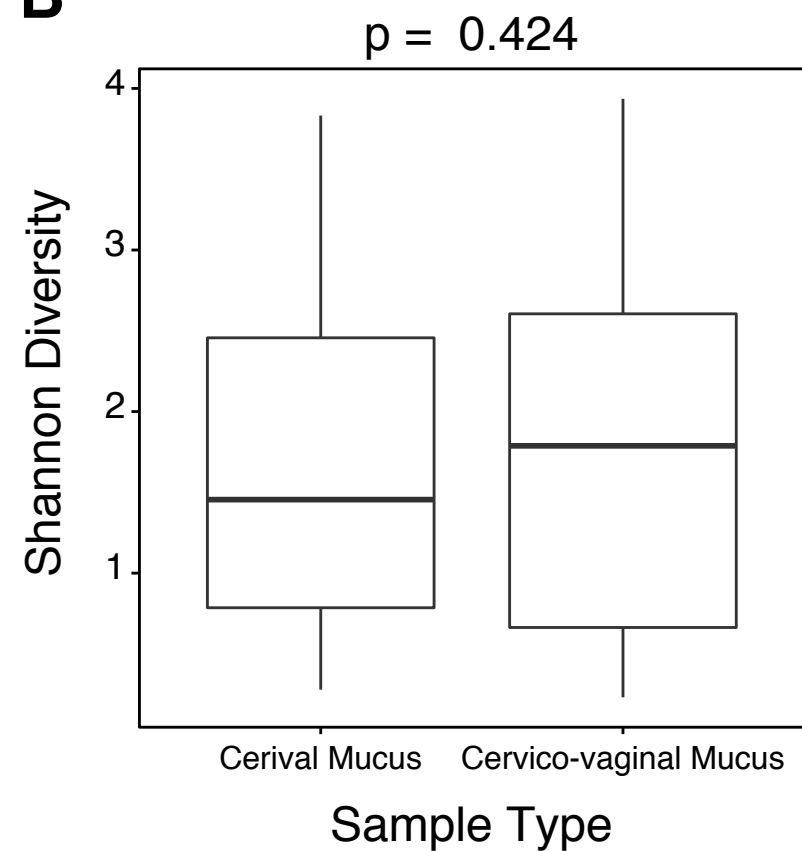**C**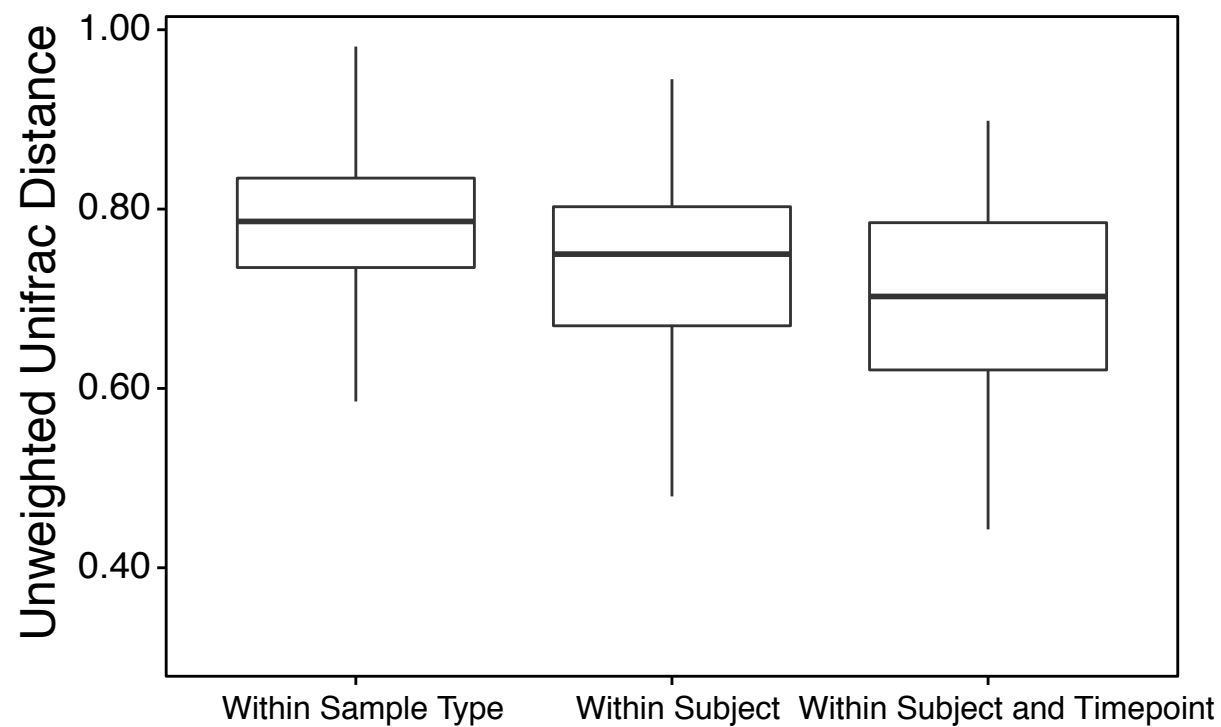**D**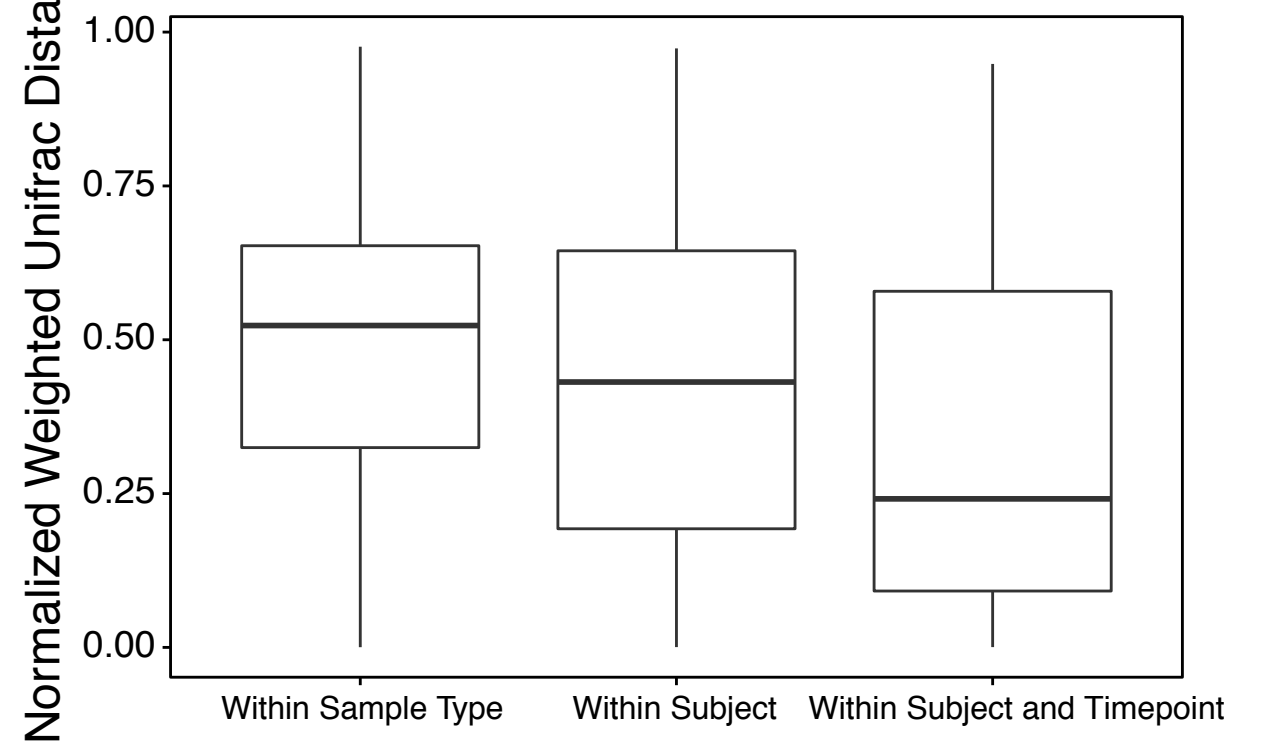

Supplement: NIHMS850743-supplement-Supplemental_Figure_4.pdf [file NIHMS850743-supplement-Supplemental_Figure_4.pdf]
